# Supplementary material for: Multi-enzyme pyruvate removal system to enhance (R)-selective reductive amination of ketones
Source: Royal Society of Chemistry journal article supplement (doi:10.1039/d0ra06140a), 2020-01-01
Supplement: d0ra06140a1.pdf [file d0ra06140a1.pdf]

1 **Supporting Information (SI)**

2

3 **Multi-enzyme pyruvate removal system to enhance**  
4 **(*R*)-selective reductive amination of ketone**

5

6 Jinhua Zhang, Yanshu Zhao, Chao Li and Hao Song\*

7

8 Frontier Science Center for Synthetic Biology and Key Laboratory of Systems

9 Bioengineering (MOE), School of Chemical Engineering and Technology, Tianjin

10 University, Tianjin, 300350, P. R. China

11

12 \* Corresponding author: H. Song. E-mail: [hsong@tju.edu.cn](mailto:hsong@tju.edu.cn). Tel: 86-18722024233.

13

14

15

16

1 **Table S1.** Sequences of the primers used in this study

| <b>Name</b> | <b>Sequence (5'-3')</b>                        |
|-------------|------------------------------------------------|
| ArR-ωTA-F   | CATATGGCTTTCTCTGCTGACACCTCT                    |
| ArR-ωTA-R   | AATACTAGTTAGTACTGAACCGGGGTC                    |
| LDH-F       | GGAATTCCATATGATGAAACTCGC                       |
| LDH-R       | ACTAGTTTAAACCAGTTCGTTTCGGG                     |
| GDH-F       | GGAATTCCATATGCATCACCATCATCACCCTACCCGGAC        |
| GDH-R       | GGACTAGTTTACCACGACCAGCCT                       |
| Ybiw-F      | GGAATTCCATATGCATCACCATCATCACCACACCACACTGAAACTG |
| Ybiw-R      | GGACTAGTTTACAGCATATGTTTCAGTACGG                |
| PflB-F      | GGAATTCCATATGCATCACCATCATCACCACATCCGAGCTTA     |
| PflB-R      | GGACTAGTTACATAGATTGAGTGAAGG                    |
| PflD-F      | GGAATTCCATATGCATCACCATCATCACCACACGAATCGTATCTC  |
| PflD-R      | GGACTAGTTACAGCTGATGCGCT                        |
| TdcE-F      | GGAATTCCATATGCATCACCATCATCACCACAAGGTAGATATTGA  |
| TdcE-R      | GGACTAGTTCAGAGCGCCTGGGTAA                      |

1 **Table S2.** Synthesized gene sequences in this study

| <b>Genes</b> | <b>Sequences</b>                                                                                                                                                                                                                                                                                                                                                                                                                                                                                                                                                                                                                                                                                                                                                                                                                                                                                                                                                                                                                       |
|--------------|----------------------------------------------------------------------------------------------------------------------------------------------------------------------------------------------------------------------------------------------------------------------------------------------------------------------------------------------------------------------------------------------------------------------------------------------------------------------------------------------------------------------------------------------------------------------------------------------------------------------------------------------------------------------------------------------------------------------------------------------------------------------------------------------------------------------------------------------------------------------------------------------------------------------------------------------------------------------------------------------------------------------------------------|
| <i>ArR-</i>  | CATATGGCTTTCTCTGCTGACACCTCTGAAATCGTTTACACCCACGACACCGGTCTGGACTACATCACC                                                                                                                                                                                                                                                                                                                                                                                                                                                                                                                                                                                                                                                                                                                                                                                                                                                                                                                                                                  |
| <i>ωTA</i>   | TACTCTGACTACGAACTGGACCCGGCTAACCCGCTGGCTGGTGGTGTCTGCTTGGATCGAAGGTGCTTT<br>CGTTCGCCGCTCTGAAGCTCGTATCTCTATCTTCGACCAGGGTTACCTGCACTCTGACGTTACCTACAC<br>CGTTTTCCACGTTTGGAACGGTAACGCTTCCGCTCTGGACGACCACATCGAACGCTCTGTTCTCTAACGC<br>TGAATCTATGCGTATCATCCCGCCGCTGACCCAGGACGAAGTTAAAGAAATCGCTCTGGAACTGGTTG<br>CTAAAACCGAACTGCGTGAAGCGTTTGTATCTGTAAGCATCACCCGTGGTTACTCTTCTACCCCGGGTG<br>AACGTGACATCACAAACACCGTCCGCAGGTTTACATGTACGCTGTTCCGTACCAGTGGATCGTTCCG<br>TTCGACCGTATCCGTGACGGTGTTCACGCTATGGTTGCTCAGTCTGTTTCGTCGTACCCCGCGTTCTTCTA<br>TCGACCCGCAGGTTAAAACTTCCAGTGGGGTGACCTGATCCGTGCTGTTTCAGGAAACCCACGACAGG<br>GGCTTCGAAGCTCCGCTCCTGCTGGACGGTGACGGTCTGCTGGCTGAAGGTTCTGGTTTCAACGTTGTT<br>GTTATCAAAGACGGTGTGTTCGTTCTCCGGGTCGTGCTGCTCTGCCGGGTATCACCCGTAAAACCGTT<br>CTGGAAATCGCTGAATCTCTGGGTCACGAAGCTATCCTGGCTGACATCACCCCTGGCTGAACTGCTGGA<br>CGCTGACGAAGTTCTGGGTTGCACCACAGCTGGCGGTGTCTGGCCGTTTCGTCTCTGTTGACGGTAACCC<br>GATCTCTGACGGTGTTCGGGTTCCGGTTACCCAGTCTATCATCCGTCGTTACTGGGAACTGAACGTTGA<br>ATCTTCTTCTCTGCTGACCCCGGTTTCAGTACTAACTAGTATTCAAGCTT |
| <i>gfp</i>   | ATGCGTAAAGGAGAAGAAGCTTTTCACTGGAGTTGTCCCAATCTTGTGTAATTAGATGGTGATGTTAAT<br>GGGCACAAATTTTCTGTCAGTGGAGAGGGTGAAGGTGATGCAACATACGGAAAAGTACCCTTAAATT<br>TATTTGCACTACTGGAAAAGTACCTGTTCCGTGGCCAACACTTGTCACTACTTTCGGTTATGGTGTTCA<br>ATGCTTTGCGAGATACCCAGATCACATGAAACAGCATGACTTTTTCAAGAGTGCCATGCCCGAAGGTT<br>ATGTACAGGAAAGAAGTATATTTTTCAAAGATGACGGGAACTACAAGACACGTGCTGAAGTCAAGTTT<br>GAAGGTGATACCCTTGTTAATAGAATCGAGTTAAAAGGTATTGATTTTAAAGAAGATGGAAACATTCT<br>TGGACACAAATTGGAATACAAGTATAACTCACACAATGTATACATCATGGCAGACAAAACAAAAGAAT<br>GGAATCAAAGTTAACTTCAAATTAGACACAACATTGAAGATGGAAGCGTTCAACTAGCAGACCATT<br>ATCAACAAAATACTCCAATTGGCGATGGCCCTGTCCTTTTACCAGACAACCATTACCTGTCCACACAAT<br>CTGCCCTTTTCGAAAGATCCCAACGAAAAGAGAGACCACATGGTTCCTTCTTGAGTTTGTAAACAGCTGCT<br>GGGATTACACATGGCATGGATGAACTATACAAATAATAA                                                                                                                                                                                                                                             |

---

*ldh*

GGAATTCCATATGATGAAACTCGCCGTTTATAGCACAAAACAGTACGACAAGAAGTACCTGCAACAG  
GTGAACGAGTCCTTTGGCTTTGAGCTGGAATTTTTTACTTTCTGCTGACGGAAAAAACCGCTAAAAC  
GCCAATGGCTGCGAAGCGGTATGTATTTTCGTAAACGATGACGGCAGCCGCCCGGTGCTGGAAGAGCT  
GAAAAAGCACGGCGTTAAATATATCGCCCTGCGCTGTGCCGGTTTCAATAACGTCGACCTTGACGCGG  
CAAAAGAACTGGGGCTGAAAGTAGTCCGTGTTCCAGCCTATGATCCAGAGGCCGTTGCTGAACACGCC  
ATCGGTATGATGATGACGCTGAACCGCCGTATTCACCGCGCGTATCAGCGTACCCGTGATGCTAACTT  
CTCTCTGGAAGTCTGACCGGCTTACTATGTATGGCAAAACGGCAGGCGTTATCGGTACCGGTAAAA  
TCGGTGTGGCGATGCTGCGCATTCTGAAAGGTTTTGGTATGCGTCTGCTGGCGTTCGATCCGTATCCAA  
GTGCAGCGGCGCTGGAACCTCGGTGTGGAGTATGTCGATCTGCCAACCCCTGTTCTCTGAATCAGACGTT  
ATCTCTCTGCACTGCCCCTGACACCGGAAAACCTATCATCTGTTGAACGAACCGCCTTCGAACAGATG  
AAAAATGGCGTGATGATCGTCAATACCAGTCGCGGTGCATTGATTGATTCTCAGGCAGCAATTGAAGC  
GCTGAAAAATCAGAAAATTGGTTCGTTGGGTATGGACGTGTATGAGAACGAACGCGATCTATTCTTTG  
AAGATAAATCCAACGACGTGATCCAGGATGACGTATTCCGTCGCCTGTCTGCCTGCCACAACGTGCTG  
TTTACCGGGCACCAGGCATTCCTGACAGCAGAAGCTCTGACCAGTATTTCTCAGACTACGCTGCAAAA  
CTTAAGCAATCTGAAAAAAGGCGAAACCTGCCCGAACGAACCTGGTTTAAACTAGTCC

---

*gdh*

GGAATTCCATATGCATCACCATCATCACCCTACCCGGACCTGAAAGGTAAAGTTGTTGCTATCACCG  
GTGCTGCTTCTGGTCTGGGTAAAGCTATGGCTATCCGTTTCGGTAAAGAACAGGCTAAAGTTGTTATCA  
ACTACTACTCTAACAAACAGGACCCGAACGAAGTTAAAGAAGAAGTTATCAAAGCTGGTGGTGAAGC  
TGTTGTTGTTACGGGTGACGTTACCAAAGAAGAAGACGTTAAAAACATCGTTCAGACCGCTATCAAAG  
AATTTGGTACCCTGGACATCATGATCAACAACGCTGGTCTGGAAAACCCGGTTCCGTCTCACGAAATG  
CCGCTGAAAGACTGGGACAAAGTTATCGGTACCAACCTGACCGGTGCTTTCCTGGGTTCTCGTGAAGC  
TATCAAATACTTCGTTGAAAACGACATCAAAGGTAACGTTATCAACATGTCTTCTGTTACGAAGTTAT  
CCCGTGGCCGCTGTTTCGTTCACTACGCTGCTTCTAAAGGTGGTATCAAACCTGATGACCGAAACCCTGG  
CTCTGGAATACGCTCCGAAAGGTATCCGTGTTAACAACATCGGTCCGGGTGCTATCAACACCCCGATC  
AACGCTGAAAAATTCGCTGACCCGAAACAGAAAGCTGACGTTGAATCTATGATCCCGATGGGTTACAT  
CGGTGAACCGGAAGAAATCGCTGCTGTTGCTGCTTGGCTGGCTTCTAAAGAAGCTAGTTACGTTACCG  
GTATCACCCCTGTTTCGCTGACGGTGGTATGACCCAGTACCCGCTTTTCCAGGCTGGTTCGTGGTAAACTAG  
TCC

---

---

*ybiw*

GAATTCCATATGCATCACCATCATCACCACACCACACTGAAACTGGACACGCTCAGCGACCGCATTAA  
AGCGCACAAAAATGCGCTGGTGCATATTGTGAAACCGCCAGTCTGTACCGAGCGCGCGCAGCACTATA  
CCGAGATGTATCAACAACATCTCGATAAGCCGATCCCGGTACGTTCGCGCGCTGGCACTGGCGCATCAC  
CTGGCGAATCGCACCATCTGGATCAAACACGATGAGTTGATCATTGGCAACCAGGCAAGCGAAGTTCCG  
CGCCGCGCCGATCTTCCCGGAATATACTGTCTCGTGGATCGAAAAAGAGATTGATGATCTGGCAGATC  
GTCCCGGTGCTGGCTTTGCGGTGAGCGAAGAGAACAAACGCGTTCTGCATGAAGTGTGCCCGTGGTGG  
CGCGGTCAGACCGTACAGGATCGCTGCTACGGCATGTTTACCGATGAGCAAAAAGGTCTGCTGGCGAC  
CGGAATCATTAAAGCGGAAGGCAATATGACCTCCGGCGATGCGCACCTGGCGGTGAATTTCCCGCTGC  
TGCTGGAAAAAGGGCTTGATGGTCTGCGCGAGGAAGTAGCGGAACGTCGCTCGCGCATCAACCTGAC  
GGTGCTGGAAGATTTACACGGTGAGCAATTCCTGAAAGCGATTGATATCGTGCTGGTGGCAGTCAGTG  
AACACATTGAACGTTTCGCTGCCCTGGCGCGTGAAATGGCCGCGACCGAAACCCGCGAAAGCCGTCGC  
GATGAACTGCTGGCGATGGCAGAAAACTGCGATCTTATCGCCCACCAGCCGCCGAGACTTTCTGGCA  
GGCGCTGCAACTGTGTTACTTCATCCAGTTGATTTTGCAGATCGAATCTAACGGTCACTCAGTATCGTT  
TGGTCGTATGGACCAGTATCTCTACCCGTA CTATCGCCGCGACGTTGAACTCAACCAGACGCTGGATC  
GCGAACACGCCATCGAGATGCTGCATAGCTGCTGGCTGAAACTGCTGGAAGTGAACAAGATCCGCTCC  
GGCTCACACTCAAAGCCTCTGCGGGAAGTCCGCTGTATCAGAACGTCACTATTGGCGGGCAAAATCT  
GGTTGATGGTCAACCAATGGACGCGGTGAATCCACTCTCTTACGCGATCCTCGAATCCTGCGGTCCG  
TGCGTTCCACTCAGCCTAACCTCAGCGTGC GTTACCATGCAGGAATGAGCAACGATTTCTCGACGCC  
TGCGTACAGGTGATCCGTTGCGGCTTCGGGATGCCGGCGTTCAACAACGACGAAATCGTGATCCCGGA  
ATTTATTA AACTCGGTATTGAACCGCAGGACGCTTATGACTACGCAGCGATTGGTTGTATAGAAACCG  
CCGTCGGTGGCAAATGGGGCTATCGCTGTACCGGCATGAGCTTTATCAACTTCGCCCGCGTGATGCTG  
GCGGCGCTGGAAGGCGGGCATGATGCCACCAGCGGCAAAGTGTTCCTGCCACAAGAAAAAGCGTTGT  
CGGCAGGTA ACTTCAACA ACTTCGATGAAGTGATGGACGCGTGGGATACGCAAATCCGTTACTACACC  
CGCAAATCAATCGAAATCGAATATGTCGTCGACACCATGCTGGAAGAGAACGTGCACGATATTCTCTG  
CTCGGCGCTGGTGGATGACTGTATTGAGCGAGCGAAAAGTATCAAGCAAGGCGCGCGAAATATGAC  
TGGGTTTCTGGCCTGCAGGTCGGCATTGCCAACCTCGGCAACAGCCTGGCGGCAGTGAAGAACTGGT  
GTTTGAACAAGGTGCGATTGGTCAGCAACAGCTTGCTGCCGCACTGGCAGATGACTTCGACGGCCTGA  
CTCACGAGCAGCTGCGTCAGCGGCTGATTAACGGTGCGCCGAAGTACGGCAACGACGATGATACTGTC

---

---

GATACGCTGCTGGCTCGCGCTTATCAGACCTATATCGACGAACTGAAACAGTACCATAATCCGCGCTA  
CGGTCGTGGTCCGGTTGGCGGCAACTATTACGCGGGTACGTCATCAATCTCCGCTAACGTACCGTTTG  
GCGCGCAGACTATGGCAACACCGGACGGGCGTAAAGCCCACACCCCGCTGGCAGAAGGGCGCAAGCCC  
GGCCTCCGGTACTGACCATCTTGGCCCTACTGCGGTCATTGGCTCAGTGGGTAAACTGCCTACGGCAG  
CGATTCTCGGCGGCGTGTGCTCAACCAGAACTGAATCCGGCAACGCTGGAGAACGAATCTGACAA  
GCAGAACTGATGATCCTGCTGCGTACCTTCTTTGAAGTGCATAAAGGCTGGCATATTCAGTACAACA  
TCGTTTCCCGCGAAACGCTGCTGGATGCGAAAAACATCCCGATCAGTATCGCGATCTGGTAGTGCGT  
GTCGCGGGCTATTCCGCGTTCTTACCGCGCTCTCTCCAGACGCTCAGGACGATATCATCGCCCGTACT  
GAACATATGCTGTAAACTAGTCC

---

*pflB*

GGAATTCCATATGCATCACCATCATCACCACATGTCCGAGCTTAATGAAAAGTTAGCCACAGCCTGGG  
AAGGTTTTACCAAAGGTGACTGGCAGAATGAAGTAAACGTCCGTGACTTCATTTCAGAAAACTACACT  
CCGTACGAGGGTGACGAGTCCTTCTGGCTGGCGCTACTGAAGCGACCACCACCCTGTGGGACAAAAGT  
AATGGAAGGCGTTAAACTGGAAAACCGCACTCACGCGCCAGTTGACTTTGACACCGCTGTTGCTTCCA  
CCATCACCTCTCACGACGCTGGCTACATCAACAAGCAGCTTGAGAAAATCGTTGGTCTGCAGACTGAA  
GCTCCGCTGAAACGTGCTCTTATCCCGTTCGGTGGTATCAAAATGATCGAAGGTTCTGCAAAGCGTA  
CAACCGGAACTGGATCCGATGATCAAAAAAATCTTCACTGAATACCGTAAACTCACAACCAGGGC  
GTGTTTCGACGTTTACTCCGGACATCCTGCGTTGCCGTAAATCTGGTGTCTGACCGGTCTGCCAGAT  
GCATATGGCCGTGGCCGTATCATCGGTGACTACCGTCGCGTTGCGCTGTACGGTATCGACTACCTGAT  
GAAAGACAACTGGCACAGTTCACTTCTCTGCAGGCTGATCTGGAAAACGGCGTAAACCTGGAACAG  
ACTATCCGTCTGCGGAAGAAATCGCTGAACAGCACCGCGCTCTGGGTGAGATGAAAGAAATGGCTG  
CGAAATACGGCTACGACATCTCTGGTCCGGCTACCAACGCTCAGGAAGCTATCCAGTGGACTTACTTC  
GGCTACCTGGCTGCTGTTAAGTCTCAGAACGGTGTGCAATGTCCTTCGGTCGTACCTCCACCTTCTG  
GATGTGTACATCGAACGTGACCTGAAAGCTGGCAAGATCACCGAACAAAGAAGCGCAGGAAATGGTTG  
ACCACCTGGTCATGAACTGCGTATGGTTCGCTTCTGCGTACTCCGGAATACGATGAACTGTTCTCTG  
GCGACCCGATCTGGGCAACCGAATCTATCGGTGGTATGGGCCTCGACGGTCGTACCCTGGTTACAAA  
AACAGCTTCCGTTTCTGAAACACCCTGTACACCATGGGTCCGTCTCCGGAACCGAACATGACCATTCTG  
TGGTCTGAAAACTGCCGCTGAACTTCAAGAAATTCGCCGCTAAAGTGTCCATCGACACCTTCTCTG  
CAGTATGAGAACGATGACCTGATGCGTCCGGACTTCAACAACGATGACTACGCTATTGCTTGCTGCGT

---

---

AAGCCCGATGATCGTTGGTAAACAAATGCAGTTCTTCGGTGCGCGTGCAAACCTGGCGAAAACCATGC  
TGTACGCAATCAACGGCGGCGTTGACGAAAACTGAAAATGCAGGTTGGTCCGAAGTCTGAACCGAT  
CAAAGGCGATGTCCTGAACTATGATGAAGTGATGGAGCGCATGGATCACTTCATGGACTGGCTGGCTA  
AACAGTACATCACTGCACTGAACATCATCCACTACATGCACGACAAGTACAGCTACGAAGCCTCTCTG  
ATGGCGCTGCACGACCGTGACGTTATCCGCACCATGGCGTGTGGTATCGCTGGTCTGTCCGTTGCTGCT  
GACTCCCTGTCTGCAATCAAATATGCGAAAGTTAAACCGATTTCGTGACGAAGACGGTCTGGCTATCGA  
CTTCGAAAATCGAAGGCGAATACCCGCAGTTTGGTAACAATGATCCGCGTGTAGATGACCTGGCTGTTG  
ACCTGGTAGAACGTTTCATGAAGAAAATTCAGAACTGCACACCTACCGTGACGCTATCCCGACTCAG  
TCTGTTCTGACCATCACTTCTAACGTTGTGTATGGTAAGAAAACGGGTAAACACCCAGACGGTCGTCG  
TGCTGGCGCGCCGTTCCGACCGGGTGCTAACCCGATGCACGGTCGTGACCAGAAAGGTGCAGTAGCCT  
CTCTGACTTCCGTTGCTAAACTGCCGTTTGCTTACGCTAAAGATGGTATCTCCTACACCTTCTCTATCGT  
TCCGAACGCACTGGGTAAAGACGACGAAGTTCGTAAGACCAACCTGGCTGGTCTGATGGATGGTTACT  
TCCACCACGAAGCATCCATCGAAGGTGGTCAGCACCTGAACGTTAACGTGATGAACCGTGAAATGCTG  
CTCGACGCGATGGAAAACCCGGAAAAATATCCGCAGCTGACCATCCGTTGATCTGGCTACGCAGTACG  
TTTCAACTCGCTGACTAAAGAACAGCAGCAGGACGTTATTACTCGTACCTTCACTCAATCTATGTAAAC  
TAGTCC

---

*pflD* GGAATTCATATGCATCACCATCATCACCACACGAATCGTATCTCTCGCCTCAAACTGCACTGTTTGC  
CAATACCCGTGAAATCTCGCTGGAGCGGGCGCTGCTTTATACCGCCAGCCATCGGCAAACCGAAGGCG  
AACCGGTGATATTGCGCCGGGCGAAAGCAACAGCGTATATCCTTGAACATGTTGAAATTTGATTTCGT  
GATGAAGAAGTATTGCCGTAACCGCACCGTAAAACCGCGCGCCGGGATTATGTCGCCGAAATGG  
ACCCTTACTGGCTGCTGAAAGAGCTGGATCAATTCCCAGCGTCCGCAGGACCGCTTTGCTATCAGC  
GAAGAAGATAAACGTATCTACCGTGAAGAGTTGTTCCCGTACTGGGAAAAACGTTTCGATGAAAGATTT  
CATCAACGGGCAGATGACAGATGAAGTAAAAGCCGCGACCAACACGCAGATTTTCAGCATCAACCAG  
ACGGATAAAGGCCAGGGGCACATTATTATTGATTACCCACGCCTGTTGAATCACGGGCTGGGTGAGCT  
GGTGGCACAGATGCAGCAACATTGTCAGCAACAGCCGAGAATCACTTTTATCAGGCCGCGTTGTTAC  
TGCTGGAAGCCTCGCAGAAACACATTTTGCGTTACGCCGAACTGGCGGAAACGATGGCGGCAAACCTG  
CACAGATGCCAGCGTCGCGAAGAGCTGCTGACTATTGCAGAGATCTCCCACCATAACGCGCAACATA  
AGCCGCAGACGTTCTGGCAGGCGTGCCAGTTATTCTGGTACATGAACATCATTCTGCAATACGAATCC

---

---

AACGCCAGTTCGCTATCGTTGGGGCGCTTCGACCAGTATATGTTGCCGTTCTATCAGACATCATTAACC  
CAGGGCGAAGATGCGGGCTTCTGAAAGAAGTCTCGAATCTTTATGGGTGAAATGCAACGACATCGT  
GCTGTTGCGCTCCACCAGTAGCGCGGTTATTTCCGCCGTTTCCCGACCGGCTATAACCGCACTGCTCGG  
CGGGTTAACCGAGAACGGACGTAGCGCGGTGAACGTGCTTTTCGTTCTTTGCCTTGACGCCTATCAAA  
GCGTGCAATTACCGCAACCGAACCTCGGGCTGCGCACTAACGCCTTGATCGACACGCCGTTCTGATG  
AAAACCGCCGAAACCATTCGTTTCGGTACCGGTATTCCGCAAATCTTTAACGATGAAGTGGTGGTGCC  
AGCGTTCCTCAACCGTGGCGTTTCGCTGGAAGATGCGCGGACTATTCCGTAGTGGGCTGTGTGGAAT  
TATCTATTCCCGGCAGAACCTACGGCTTGCATGACATCGCGATGTTTAATCTGCTGAAAGTGATGGAA  
ATCTGCCTGCATGAAAATGAAGGCAATGCTGCGCTGACTTATGAAGGTTTACTGGAGCAGATCCGCGC  
CAAGATCAGCCACTACATCACCTGATGGTTGAGGGCAGCAATATTTGTGATATCGGCCATCGCGACT  
GGCACCTGTACCGCTGCTCTCATCGTTTATCAGCGATTGTCTGGAAAAAGGCCGCGATATTACCGAT  
GGCGGCGCGGTTATAACTTCTCCGGCGTACAGGGGATCGGTATCGCCAACCTGAGCGATTCTCTCCA  
TGC GTT GAAAGGGATGGTTTTT GAGCAACAGCGTTTAAGTTTTGACGAATTGCTGTCGGTATTAAG  
CCA ACTTCGCAACGCCAGAAGGGGAAAAAGTCCGCGCTCGCTTAATTAACCGCTTCGAGAAATACGGT  
AACGATATCGACGAGGTGGATAACATCAGCGCCGAACTGTTGCGCCACTACTGCAAAGAAGTGAAAA  
AATACCAGAACCCGCGCGGGGCTACTTCACGCCGGGATCGTATAACCGTTTCTGCTCACGTCCC GTT  
GGATCGGTGGTTGGCGCGACGCCAGACGGTTCGTTTTGCCGGAGAACAGCTGGCAGACGGCGGCTTGTC  
ACCCATGCTGGGCCAGGACGCACAAGGGCCAACAGCGGTAAGTCAAGTCAGTCAGTAAGCTCGATAAC  
ACGCTGCTGTCTAACGGTACGTTGCTGAACGTGAAATTCCTCCGGCGACCCTGGAAGGTGAAGCAGG  
ATTACGCAAACCTGGCCGACTTCTTACGGGCGTTTACCCAGCTTAAGTTACAACATATTCAGTTAACGT  
GGTGAACGCCGACACGTTGCGGGAAGCGCAACAGCGCCACAAGATTATGCCGGGCTGGTGGTGCGC  
GTTGCCGGATACAGCGCCTTCTTTGTCGAACTGTGCAAGGAGATCCAGGATGACATCATCCGCCGGAC  
AGCGCATCAGCTGTAAACTAGTCC

---

*tdcE* GGAATTCCATATGCATCACCATCATCACCACAAGGTAGATATTGATACCAGCGATAAGCTGTACGCCG  
ACGCATGGCTTGGCTTTAAAGGTACGGACTGGAAAAACGAAATTAATGTCCGCGATTTTATTCAACAT  
AACTATACACCGTATGAAGGCGATGAATCTTTCTCGCCGAAGCGACGCCTGCCACCACGGAATTGTG  
GGAAAAAGTAATGGAAGGCATCCGTATCGAAAATGCAACCCACGCGCCGTTGATTTGATACCAAT  
ATTGCCACCACAATTACCGCTCATGATGCGGGATATATTAACCGCCGCTGGAAAAAATTGTTGGCCT

---



---

GCAAACGGATGCGCCGTTGAAACGTGCGCTACACCCGTTCCGGTGGCATTAAATATGATTA AAAAGTTCAT  
TCCACGCCTATGGCCGAGAAATGGACAGTGAATTTGAATATCTGTTTACCGATCTGCGTAAAACCCAT  
AACCAGGGCGTATTTGATGTTTACTCACCGGATATGCTGCGCTGCCGTAAATCTGGCGTGCTGACCGG  
TTTACCAGATGGCTATGGCCGTGGGCGCATTATCGGTGACTATCGCCGCGTAGCGCTGTATGGCATCA  
GTTATCTGGTACGTGAACGCGAACTGCAATTTGCCGATCTCCAGTCTCGTCTGGAAAAAGGCGAGGAT  
CTGGAAGCCACCATCCGTCTGCGTGAGGAGCTGGCAGAGCATCGTCATGCGCTGTTGCAGATTCAGGA  
AATGGCGGCGAAATATGGCTTTGATATCTCTCGCCCGGCGCAGAATGCGCAGGAAGCGGTGCAGTGG  
CTCTACTTCGCTTATCTGGCGGCAGTGAAATCGCAAATGGCGGCGCGATGTCGCTGGGCCGCACGGC  
ATCGTTCCCTCGATATCTACATTGAGCGCGACTTTAAAGCTGGCGTACTCAATGAGCAGCAGGCACAGG  
AACTGATCGATCACTTCATCATGAAGATCCGTATGGTACGCTTCTGCGTACACCGGAATTTGATTCGC  
TGTTCTCCGGCGACCCAATCTGGGCGACGGAAGTGATCGGCGGGATGGGGCTGGACGGTCGTACGCTG  
GTGACCAAAAACCTCCTCCGCTATTTGCACACCCTGCACACTATGGGGCCGGCACCGGAACCTAACCT  
GACCATTCTTTGGTCGGAAGAATTACCGATTGCCTTCAAAAAATATGCCGCGCAGGTGTCGATCGTCA  
CCTCTTCCTTG CAGTATGAAAATGACGATCTGATGCGTACTGACTTCAACAGCGACGATTACGCGATT  
GCCTGCTGCGTCAGCCCAATGGTGATTGGTAAGCAAATGCAGTTCTTTGGTGACGCGCTAACCTGGC  
GAAAACGCTGCTCTACGCAATTAACGGCGGGGTGGACGAGAAGCTGAAGATTCAGGTCGGGCGGAAA  
ACAGCACCGCTGATGGACGACGTGCTGGATTACGACAAAGTGATGGACAGCCTCGATCACTTCATGGA  
CTGGCTGGCGGTGCAGTACATCAGCGCGCTGAATATCATTCACTACATGCACGACAAGTACAGCTACG  
AAGCTTCGCTGATGGCGCTGCACGATCGTGATGTCTATCGCACTATGGCATGCGGCATCGCGGGCCTG  
TCGGTGGCGACGGACTCCCTGTCTGCCATCAAATATGCCCGCGTGAAACCAATCCGTGACGAAAACGG  
CCTGGCGGTGGACTTTGAAATCGACGGTGAATATCCGCAGTACGGCAACAACGACGAGCGCGTAGAC  
AGCATTGCCTGCGACCTGGTTGAACGCTTTATGAAGAAAATTAAGCGCTGCCAACCTATCGCAACGC  
CGTCCCTACCCAGTCGATTCTGACTATCACTTCTAACGTGGTGTACGGCCAGAAAACCGGTAATACGC  
CGGACGGTCGTCGCGCCGGAACACCGTTTCGCGCCGGGCGCTAACCCGATGCATGGTCGTGACCGCAA  
AGGTGCCGTGGCCTCATTGACGTCGGTGGCGAAACTGCCGTTACCTACGCCAAAGATGGGATCTCGT  
ACACCTTCTCAATCGTTCTGCGGCGCTGGGCAAAGAAGATCCAGTACGTAAAACCAACCTTGTCGGC  
CTGCTGGATGGGTATTTCCACCACGAAGCGGATGTCGAAGGCGGTCAACACCTCAACGTCAACGTAAT  
GAATCGGGAAATGCTGCTGGATGCCATCGAGCACCCGGAAAAATATCCTAACCTGACAATCCGTGTCT

---

---

CTGGCTACGCCGTGCGCTTCAACGCACTGACCCGTGAACAGCAACAGGATGTTATTTACGTACCTT  
ACCCAGGCGCTCTGAACTAGTCC

---

1

2

3

4

1 **Table S3.** GC analyses of substrates and products.

| <b>Substrate</b>    | <b>Retention time [min]</b> | <b>Product</b>        | <b>Retention time [min]</b> |
|---------------------|-----------------------------|-----------------------|-----------------------------|
| 2-pentanone         | 4.5                         | pentan-2-amine        | 4.3                         |
| 4-phenyl-2-butanone | 16.1                        | 4-phenylbutan-2-amine | 21.6                        |
| cyclohexanone       | 7.1                         | cyclohexylamine       | 8.5                         |

2

3

1 **Table S4.** Chiral analyses of the products.

| <b>Product</b>        | <b>Retention time [min] (<i>S</i>)</b> | <b>Retention time [min] (<i>R</i>)</b> |
|-----------------------|----------------------------------------|----------------------------------------|
| Pentan-2-amine        | 9.4                                    | 9.6                                    |
| 4-phenylbutan-2-amine | 34.5                                   | 34.9                                   |

2

3

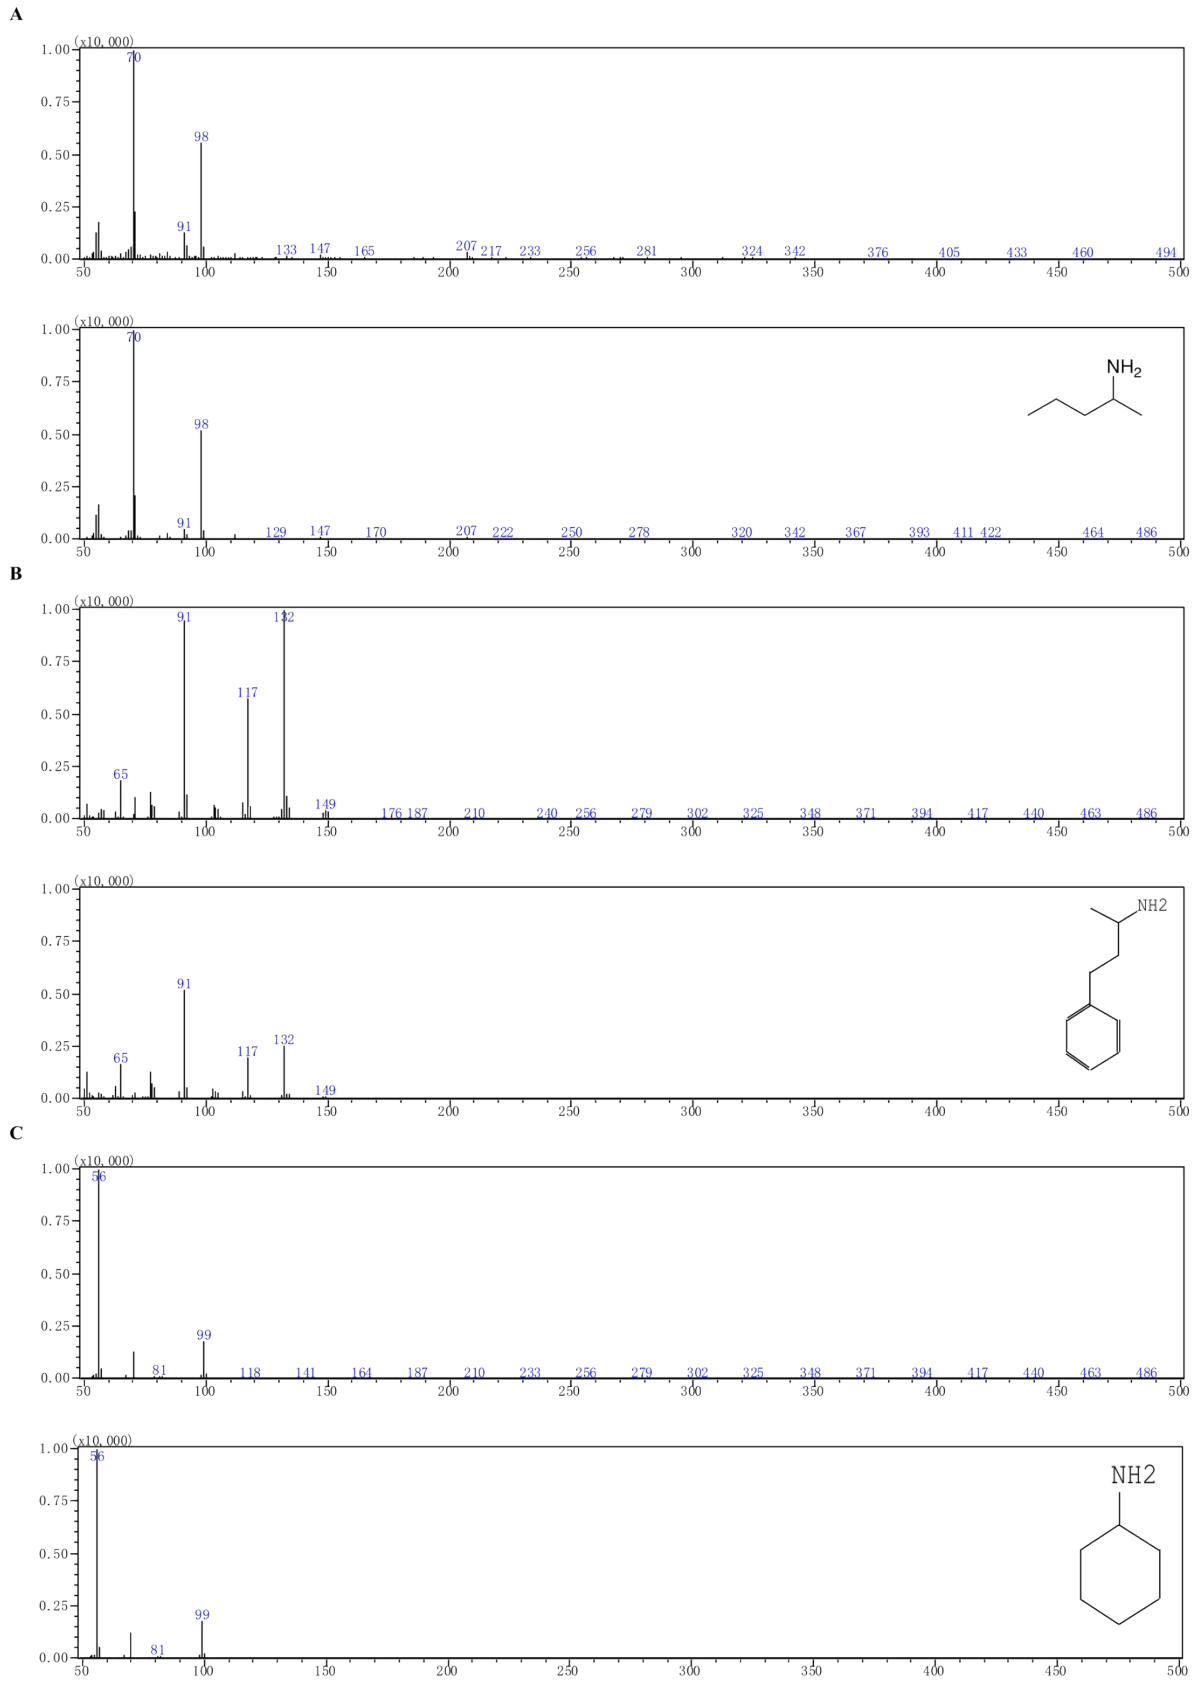

**A**

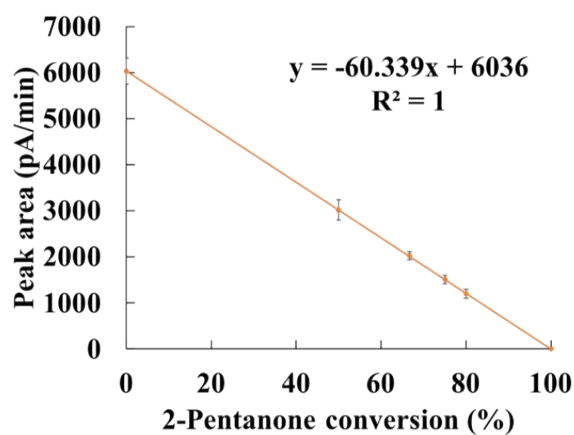

**B**

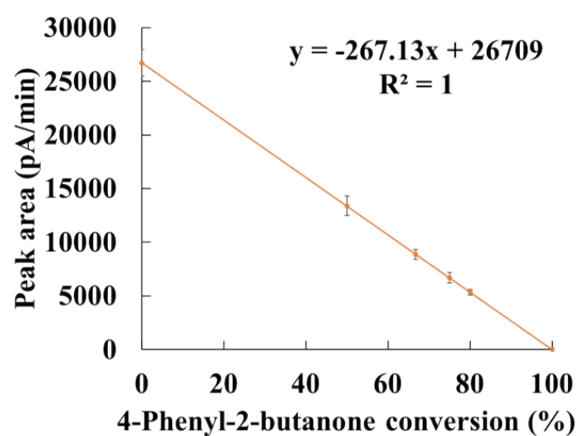

**C**

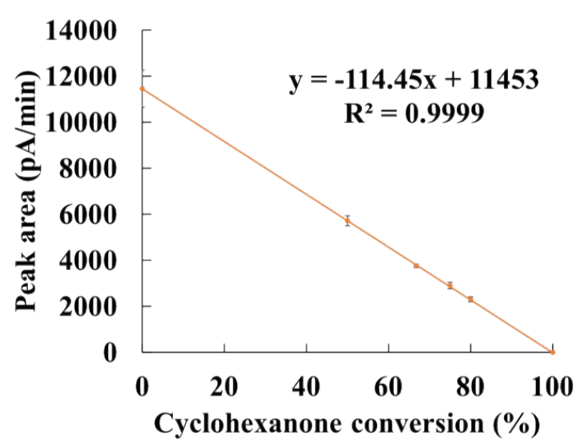

1

2 **Figure S2.** The standard curves of substrates. (A-C) The standard curves of 2-  
3 pentanone, 4-phenyl-2-butanone and cyclohexanone, respectively. Results are  
4 represented as mean  $\pm$  SD of three replicates.

5

1

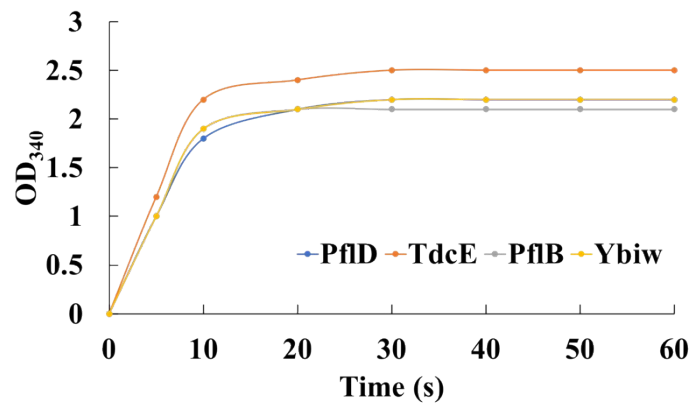

2

3 **Figure S3.** The profiles of OD<sub>340</sub> versus time.

4

5

6

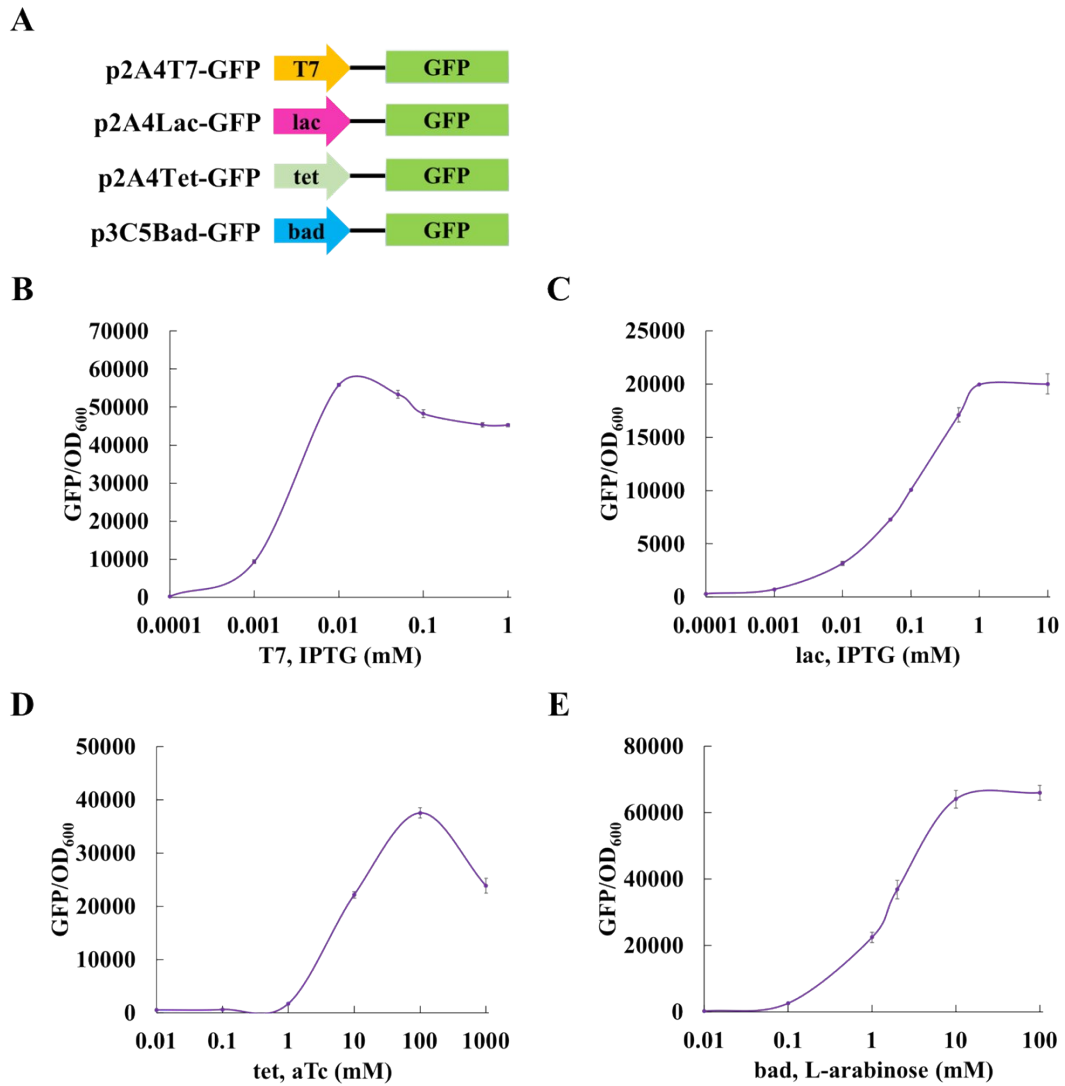

1

2 **Figure S4.** Expression of GFP with different promoters in *E. coli*. (A) Schematic diagram of  
 3 plasmids used for GFP expression. (B-E) GFP/OD<sub>600</sub> results from cultures of *E. coli* containing  
 4 indicated promoters with inducing the expression of GFP at 25°C for 16 h. Results are  
 5 represented by the mean values of three replicates and the error bar by the standard deviation.

6
